# Supplementary material for: A phenome-wide association study of genetically mimicked statins
Source: Springer Nature journal article supplement (doi:10.1186/s12916-021-02013-5), 2021-06-30

Figure I

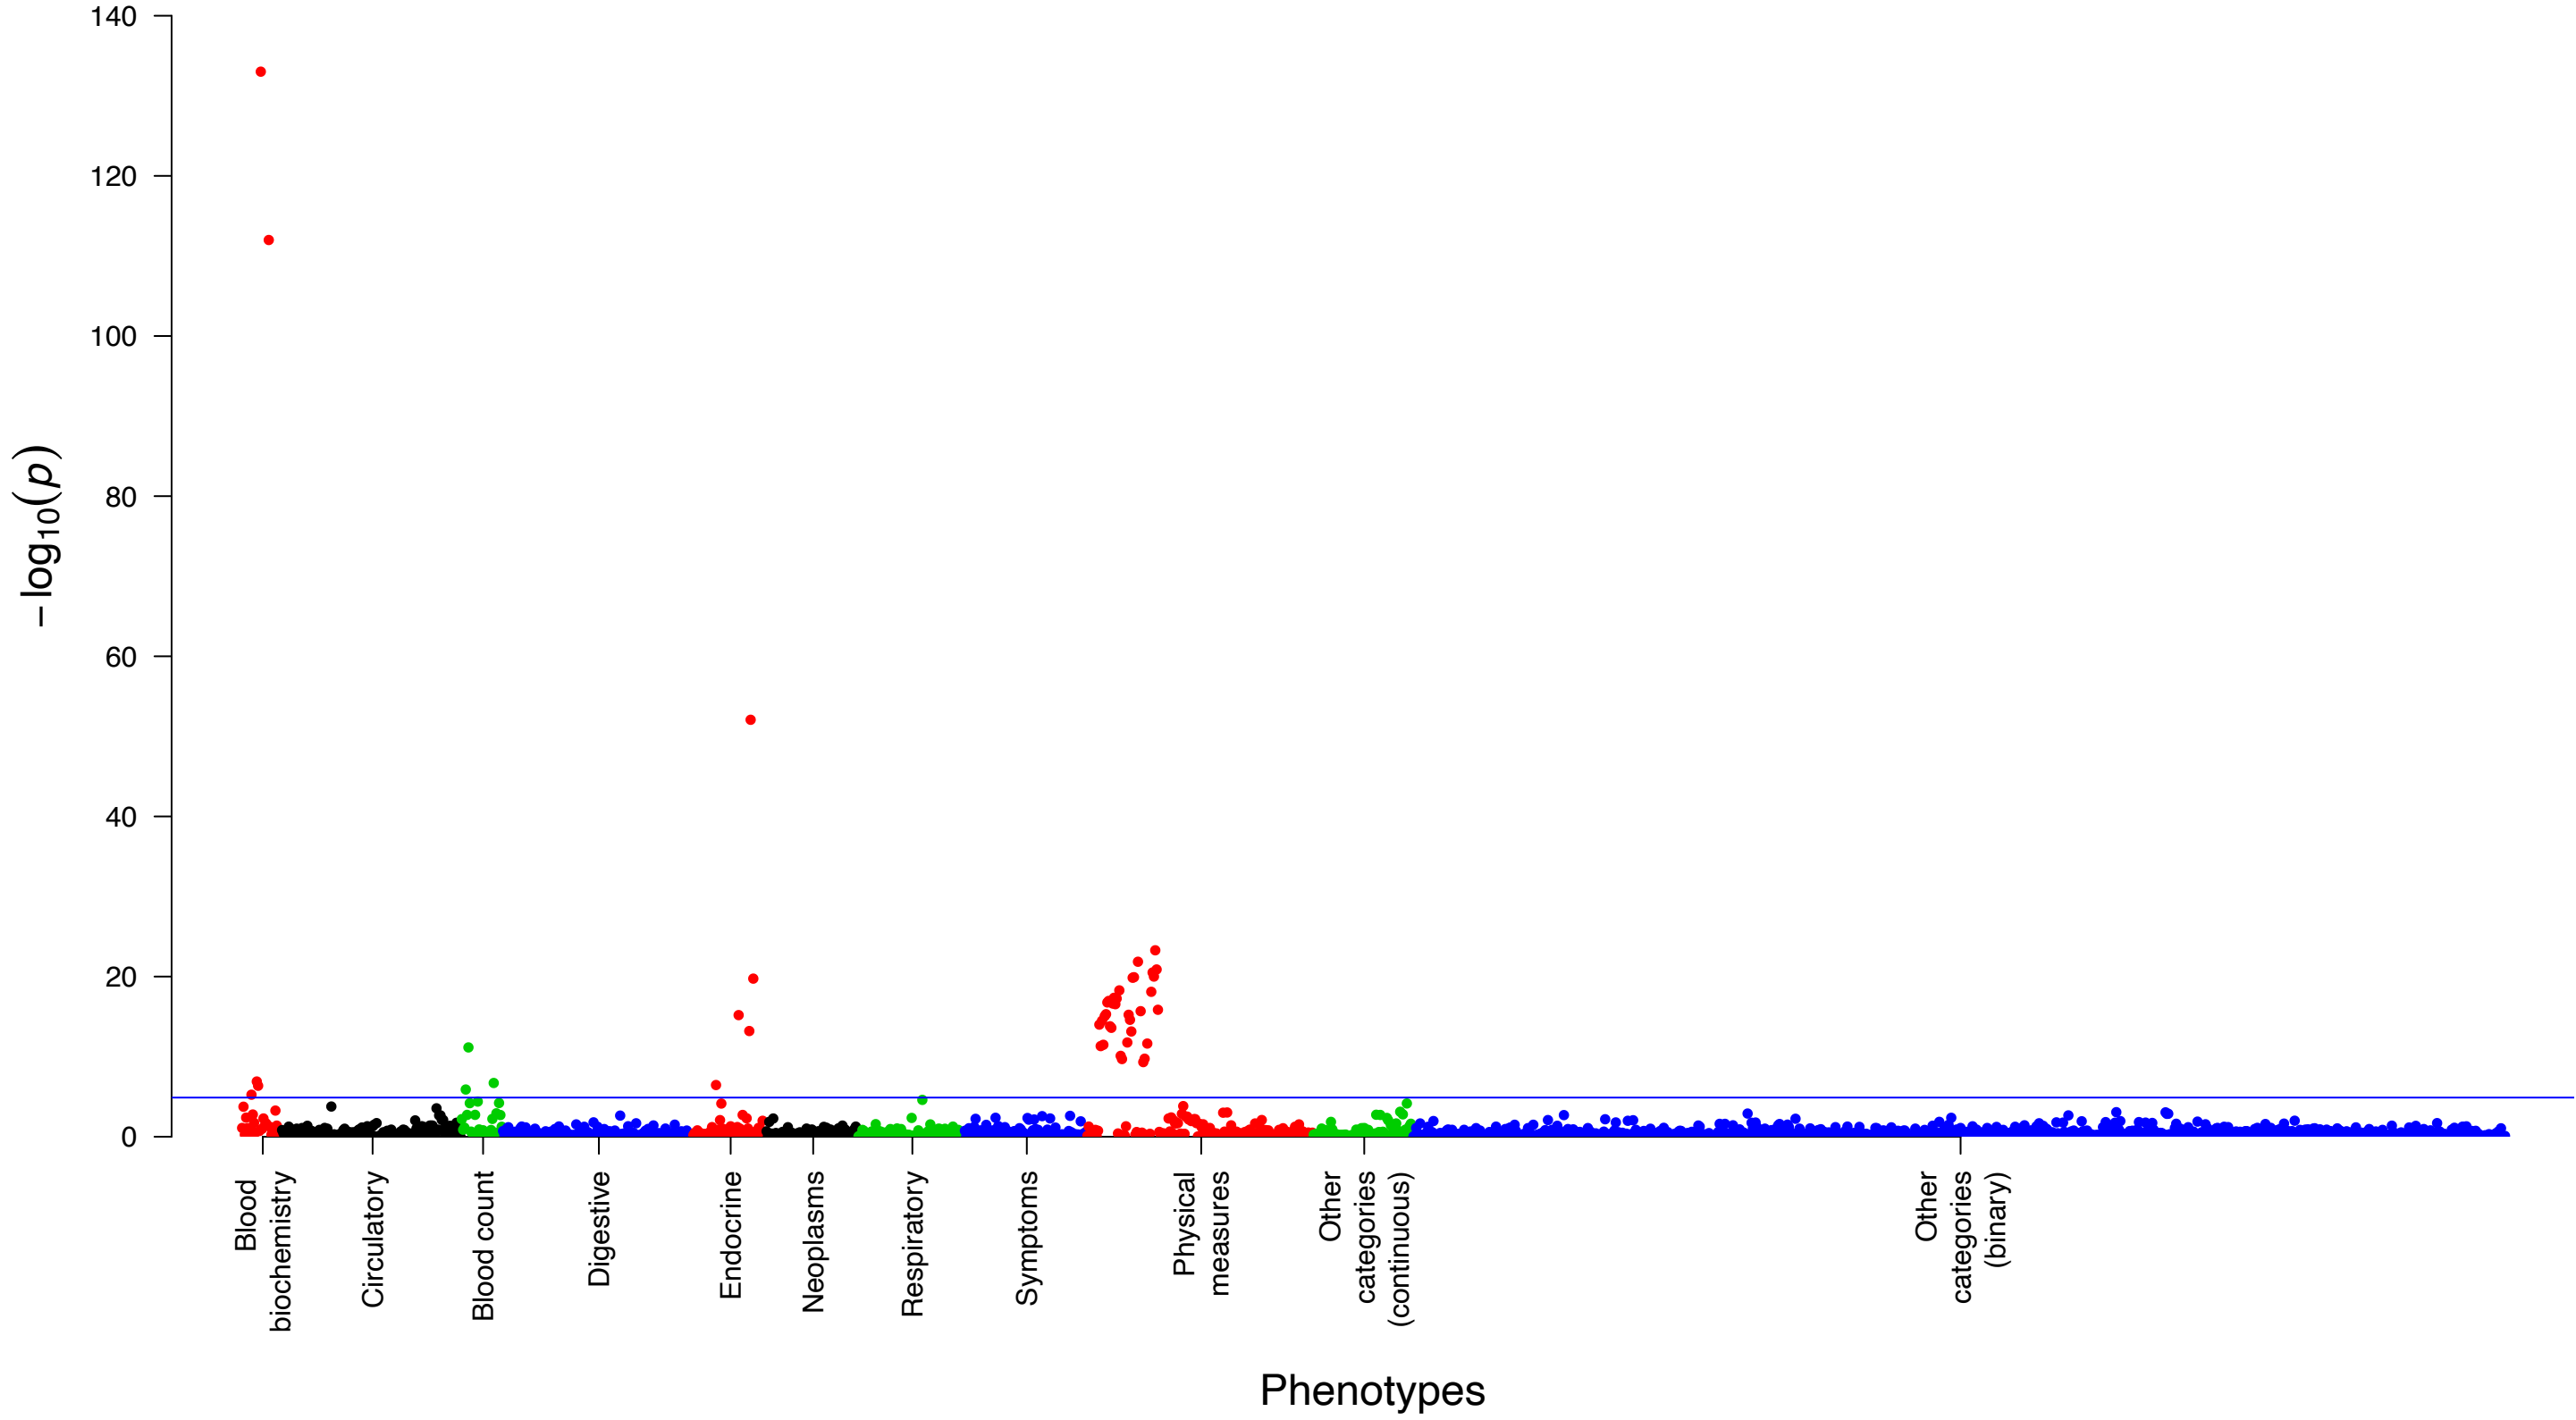

■ Primary results ■ Sensitivity analysis

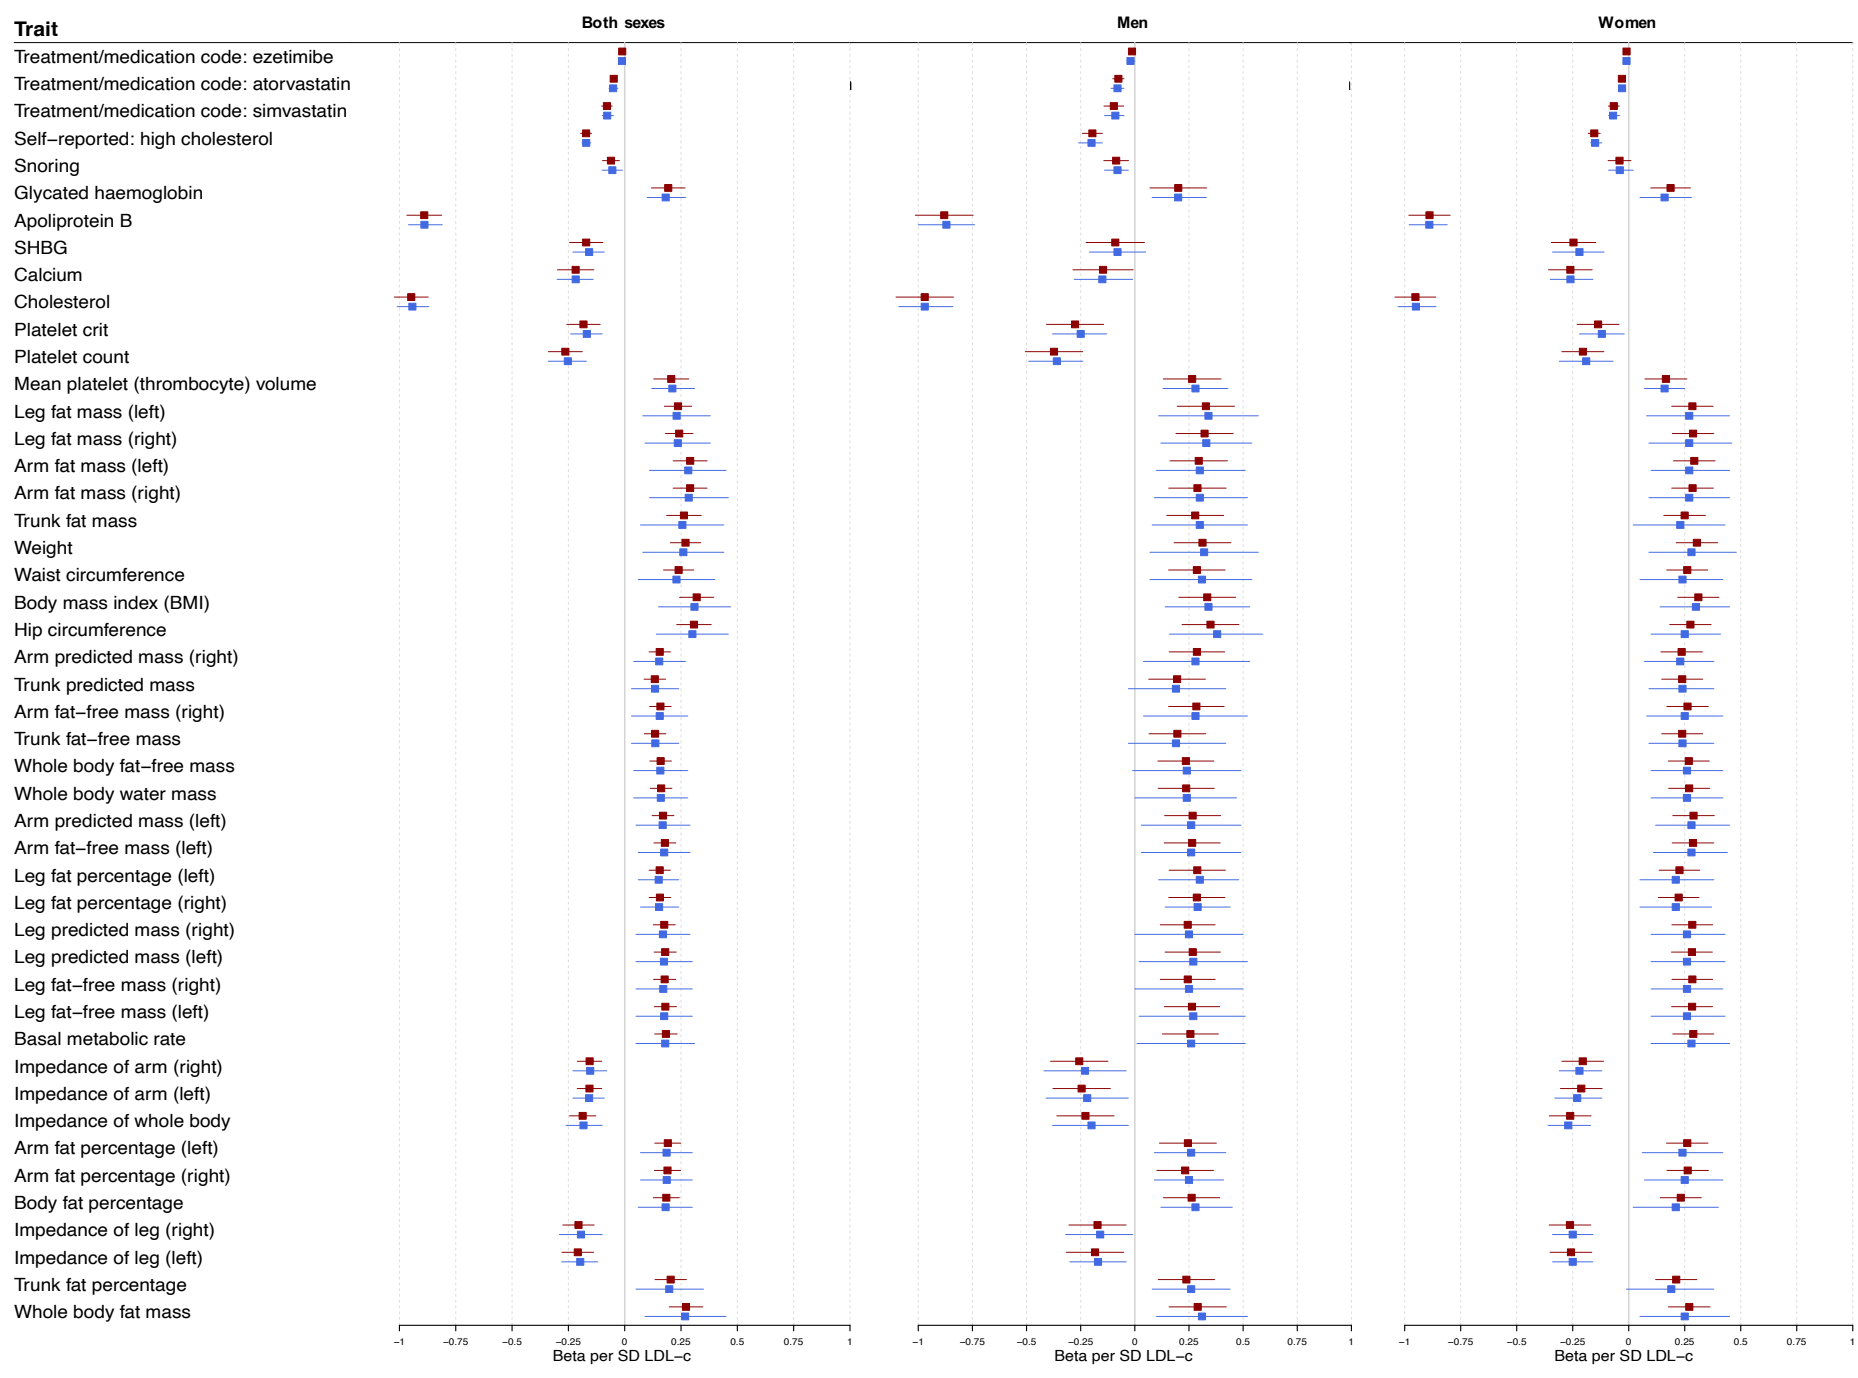

Figure III

■ Primary results ■ Sensitivity analysis

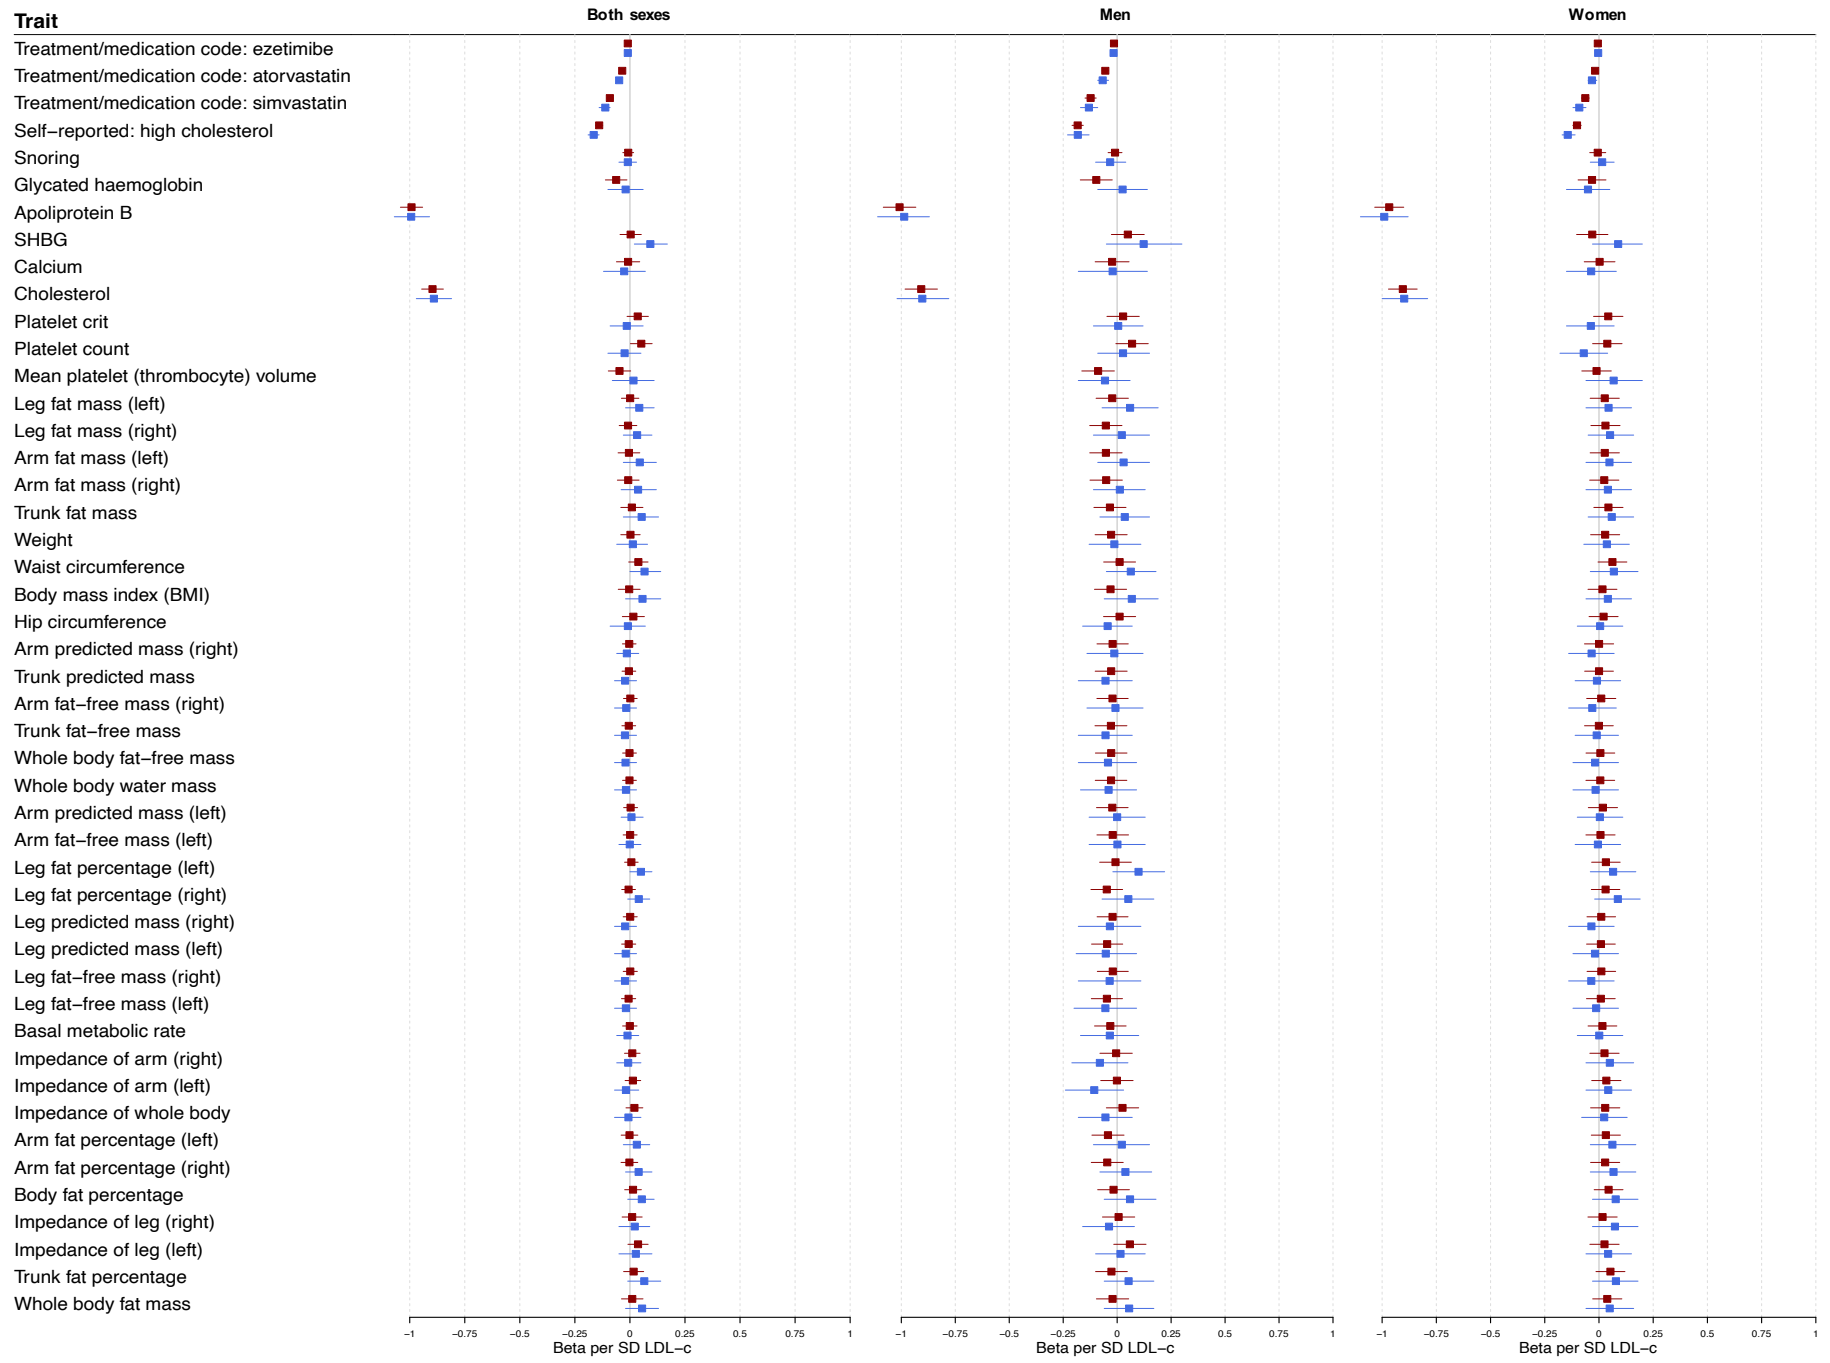

Figure IV

■ Primary results ■ Sensitivity analysis

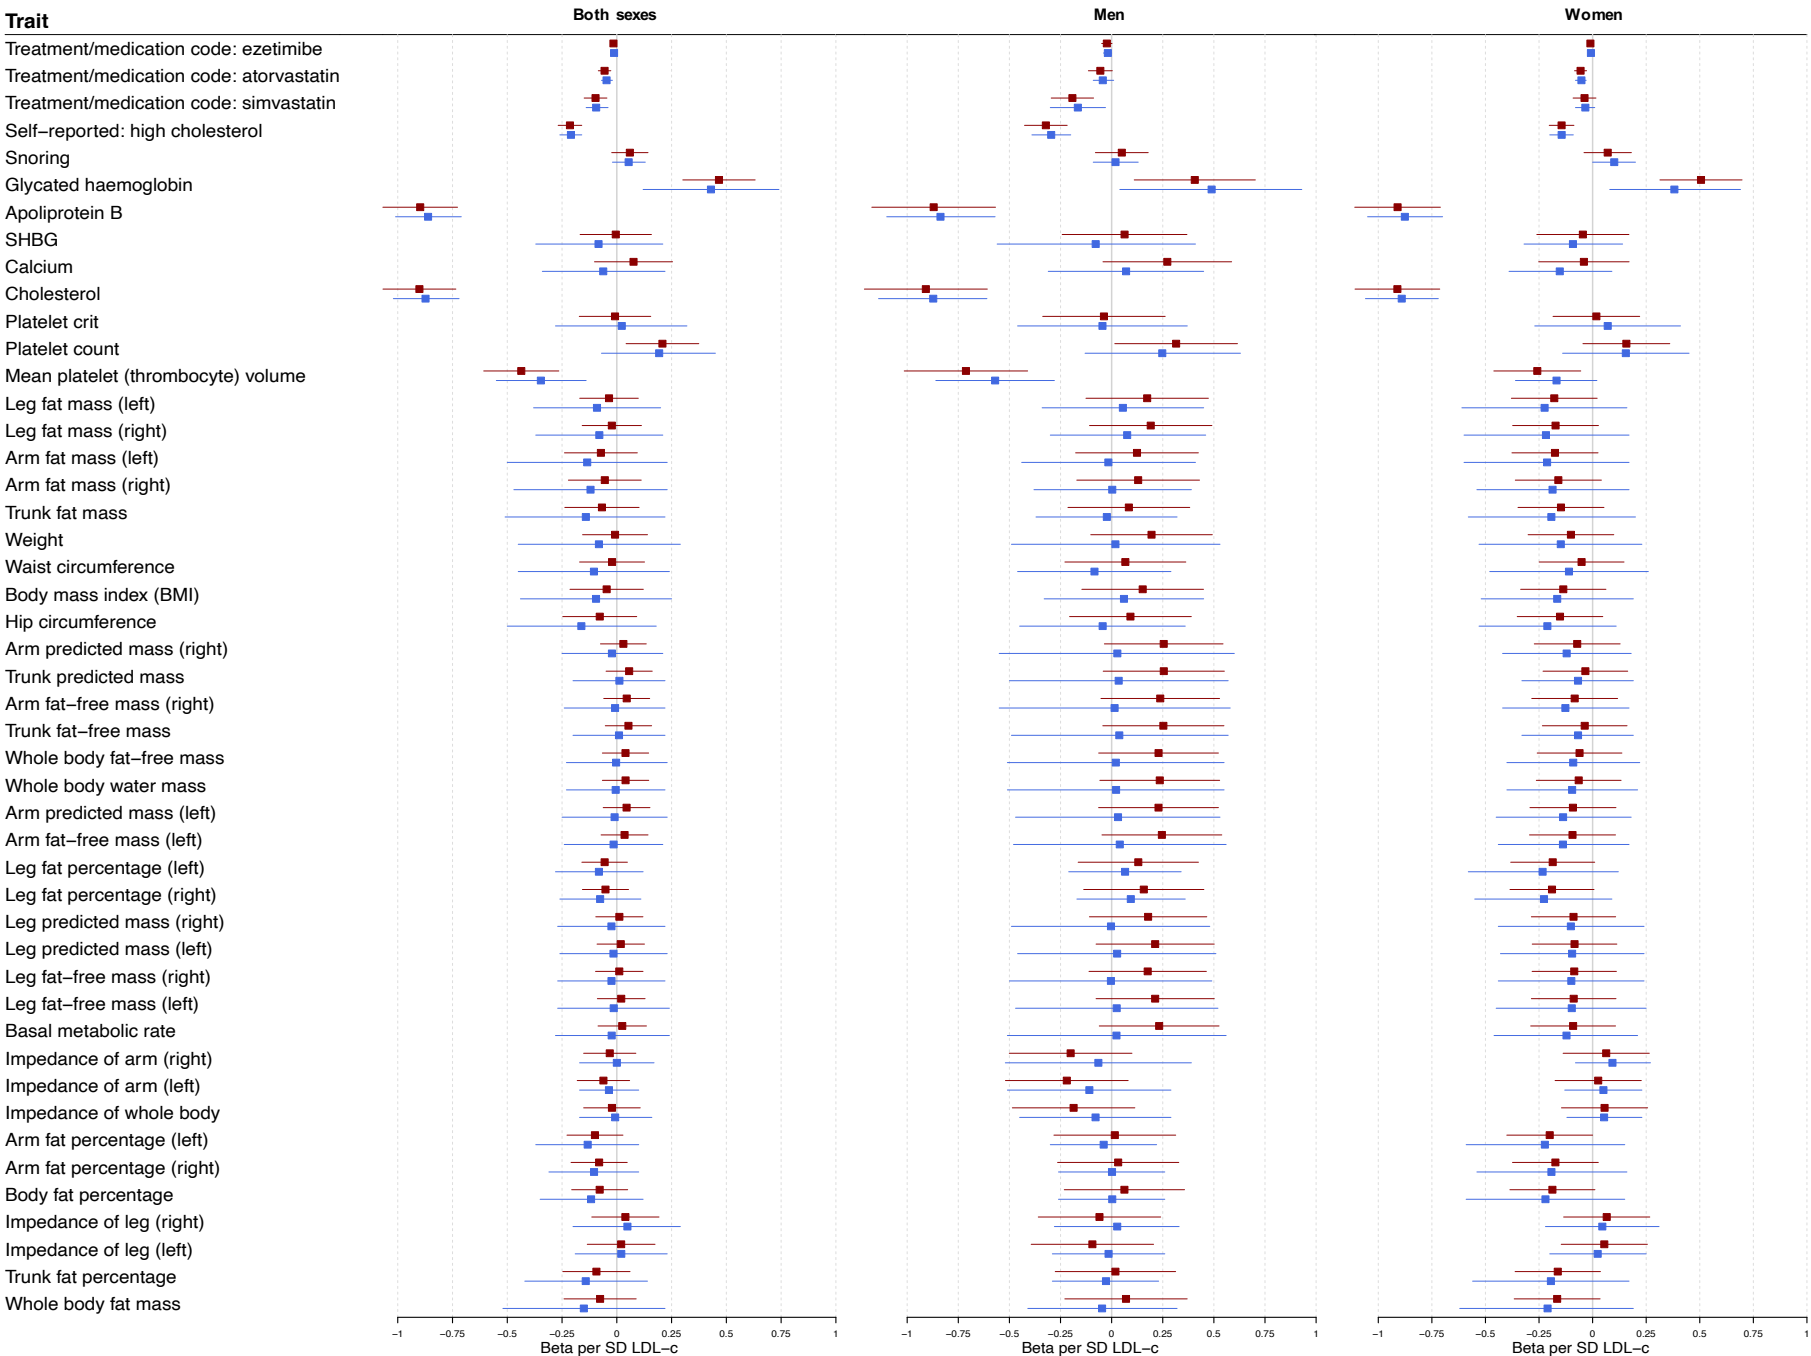

Supplement: MOESM2 [file 19315808]
